# Supplementary material for: Non-mercury catalytic acetylene hydrochlorination over bimetallic Au–Co(iii)/SAC catalysts for vinyl chloride monomer production
Source: Royal Society of Chemistry journal article supplement (doi:10.1039/c3gc36840h), 2013-01-01
Supplement: c3gc36840h.pdf [file c3gc36840h.pdf]

# **Non-mercury catalytic acetylene hydrochlorination over bimetallic Au-Co(III)/SAC catalysts for vinyl chloride monomer production**

**Haiyang Zhang,<sup>a</sup> Bin Dai,<sup>\*b</sup> Xugen Wang,<sup>a,b</sup> Wei Li,<sup>a</sup> You Han,<sup>a</sup> Junjie Gu<sup>a</sup> and Jinli Zhang<sup>\*a,b</sup>**

*<sup>a</sup>School of Chemical Engineering & Technology, Tianjin University, Tianjin, 300072, People's Republic of China*

*<sup>b</sup>School of Chemistry and Chemical Engineering, Shihezi University/Key Laboratory for Green Processing of Chemical Engineering of Xinjiang Bintuan, Shihezi, Xinjiang 832003, People's Republic of China*

\*Email: [dbinly@126.com](mailto:dbinly@126.com), [zhangjinli@tju.edu.cn](mailto:zhangjinli@tju.edu.cn)

## **Supplementary Information**

### **Table of contents:**

**Fig. S1.** Isothermal adsorption-desorption curves of fresh samples.

**Fig. S2.** H<sub>2</sub>-TPR profiles of the fresh monometallic and bimetallic Au-based catalysts.

**Fig. S3.** XRD patterns of carrier SAC, the fresh (a) and used (b) Au and bimetallic Au-based catalysts.

**Fig. S4.** Catalyst experimental setup.

**Fig. S5.** GC-MS spectrum of the products.

**Fig. S6.** Gas chromatogram spectrum of the products.

**Table S1.** Weight loss of fresh and used Au/SAC catalysts under different temperature

ranges

**Table S2.** Weight loss of fresh and used Au<sub>1</sub>Co(III)<sub>3</sub>/SAC catalysts under different temperature ranges

**Table S3.** The Au species amount of the total Au loading determined by TPR

**Table S4.** Sizes of Au particles in Au-based catalysts, determined by XRD<sup>a</sup>

**Table S5.** Relative content of Au species in the catalysts before and after reaction, determined by XPS

**Table S6.** The loss ratio of Au in those catalysts

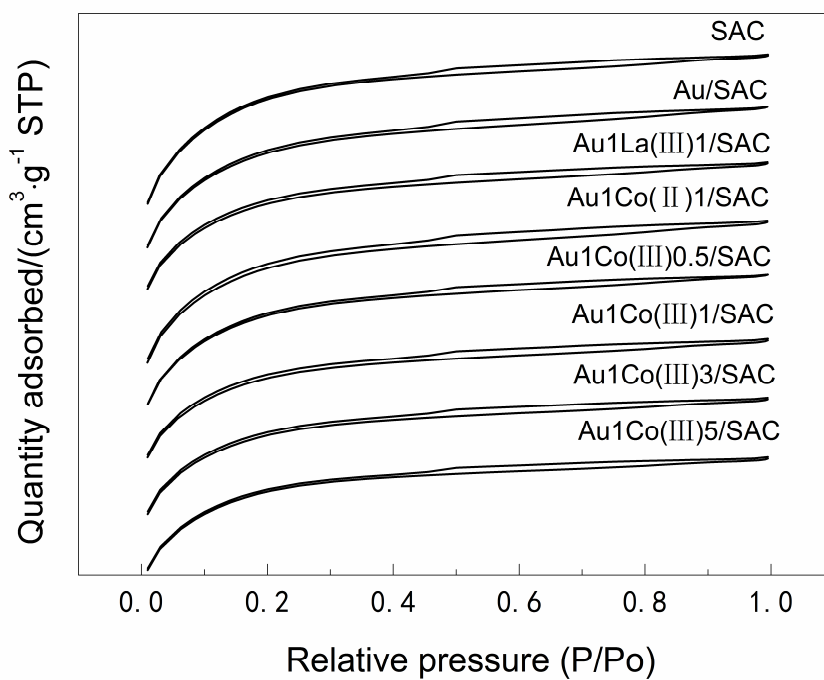

**Fig. S1** Isothermal adsorption-desorption curves of fresh samples.

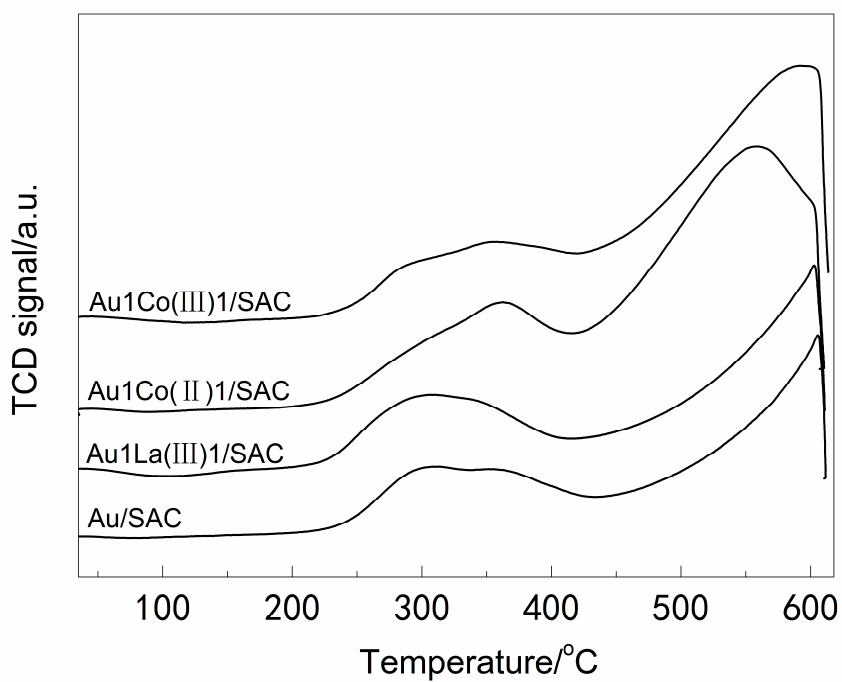

**Fig. S2** H<sub>2</sub>-TPR profiles of the fresh monometallic and bimetallic Au-based catalysts.

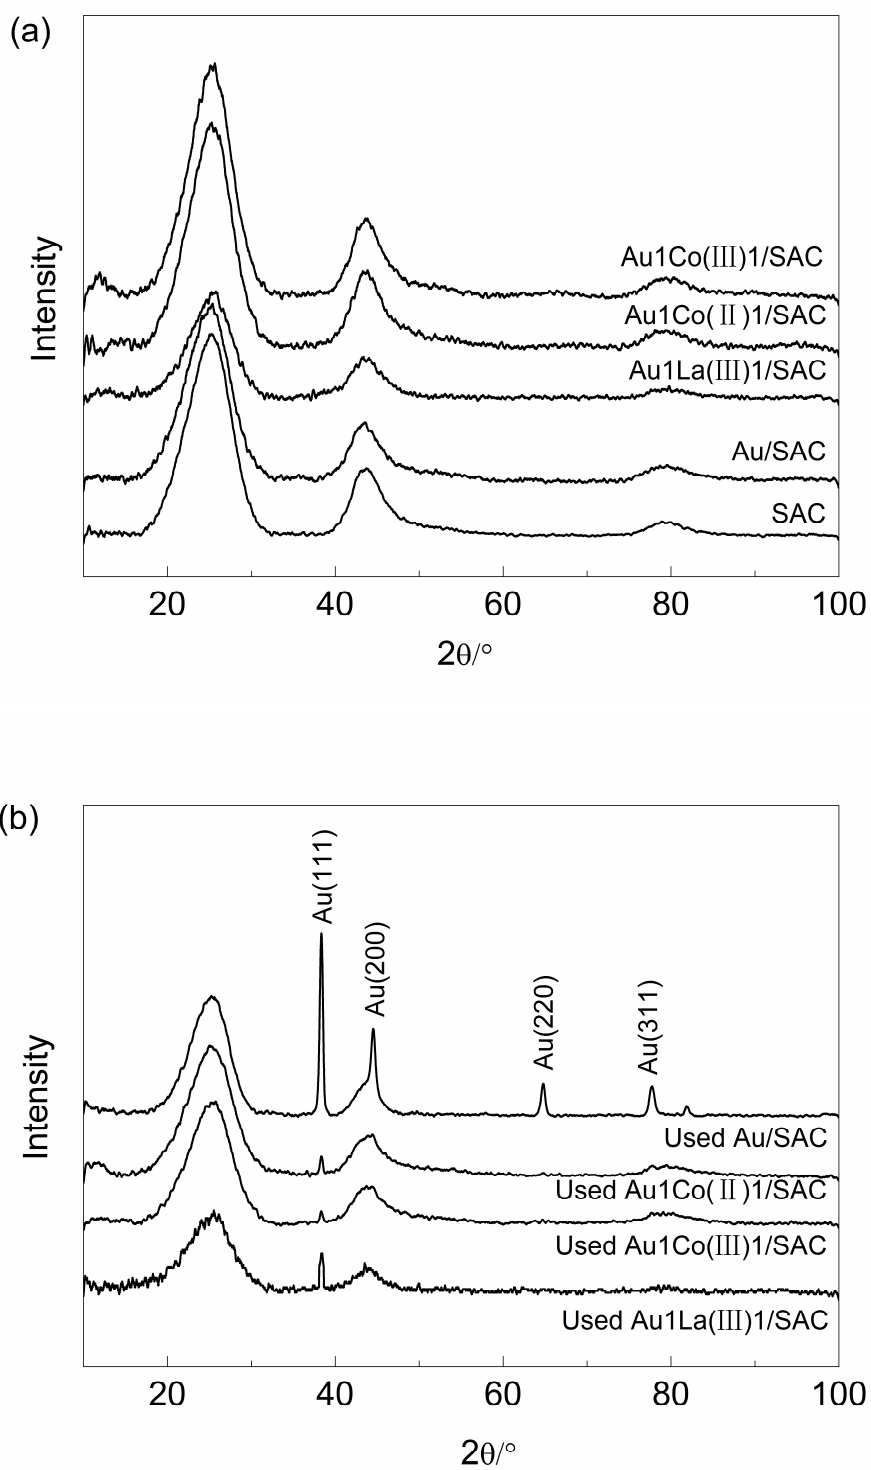

**Fig. S3** XRD patterns of carrier SAC, the fresh (a) and used (b) Au and bimetallic Au-based catalysts.

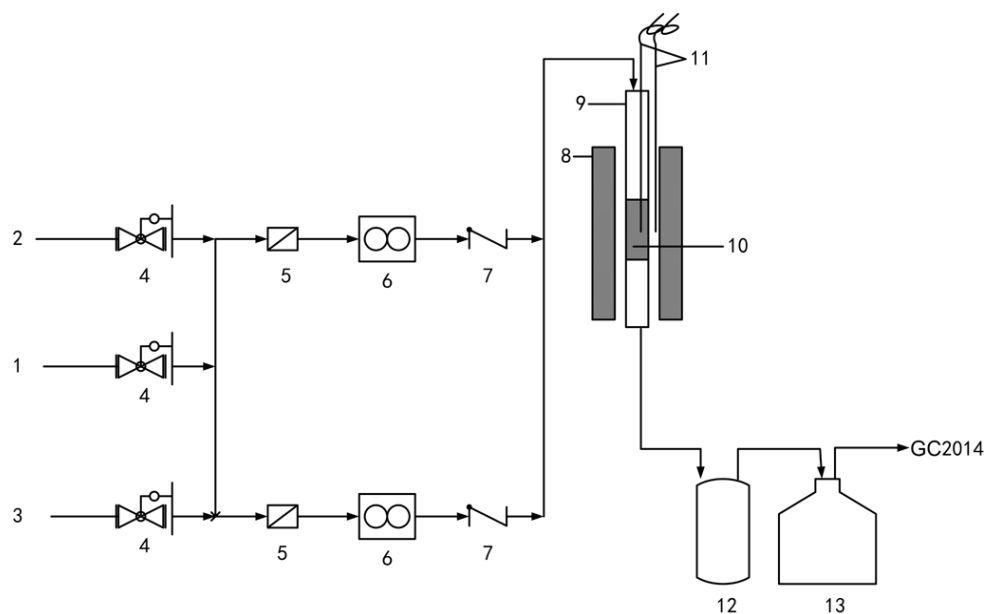

**Fig. S4** Catalyst experimental setup. 1. Nitrogen, 2. Hydrogen chloride, 3. Acetylene, 4. Pressure relief valve, 5. Filter, 6. Mass flowmeter, 7. One-way check valve, 8. Furnace, 9. Reactor, 10. Catalyst, 11. Thermocouple, 12. Buffer tank, 13. Absorption bottle.

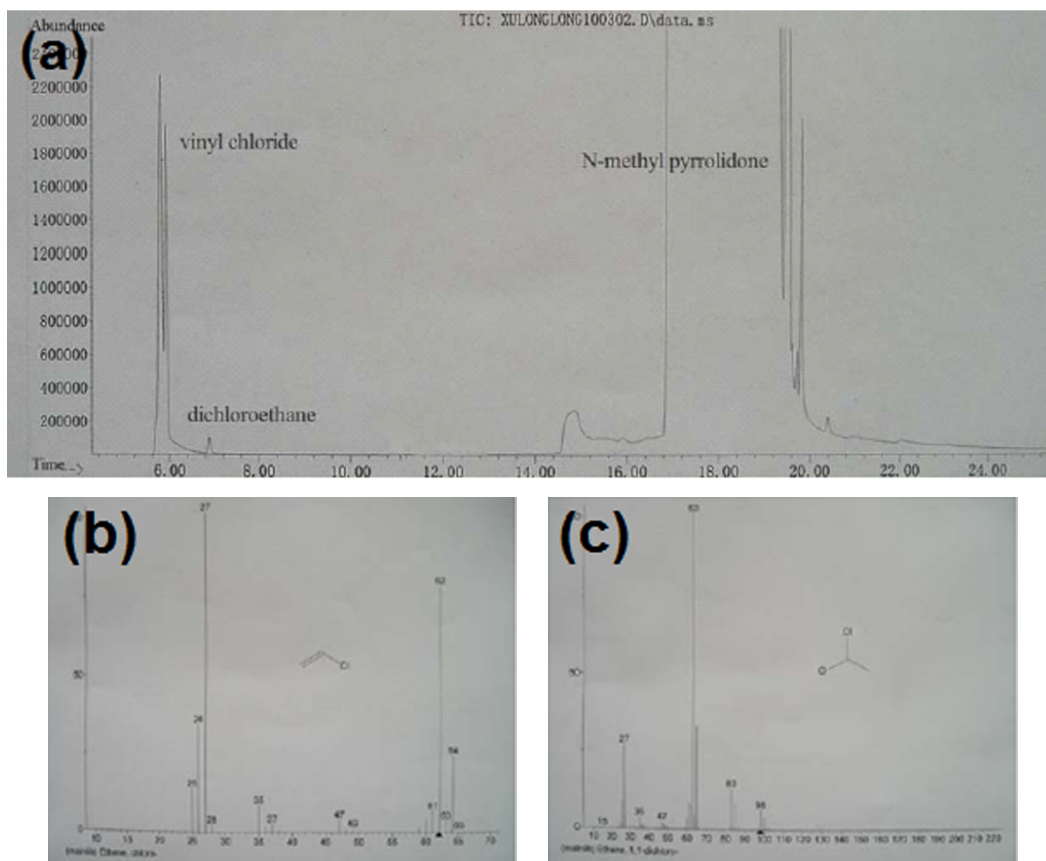

**Fig. S5** GC-MS spectrum of the products. Analysis conditions are as follows: Agilent 7890A/5975C GC-MS; capillary column HP-5: 60 m × 0.25 mm × 0.25 μm; inlet temperature, 250 °C; split ratio, 50:1; ion source, EI source; ion source temperature, 230 °C; quadrupole temperature, 150 °C; electron energy, 70 eV; interface temperature, 280 °C.

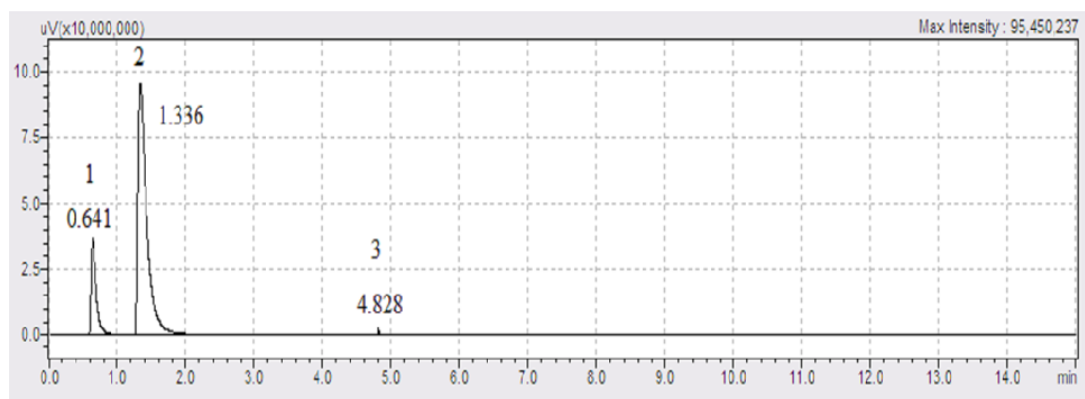

1: C<sub>2</sub>H<sub>2</sub>    2: C<sub>2</sub>H<sub>3</sub>Cl    3: C<sub>2</sub>H<sub>4</sub>Cl<sub>2</sub>

**Fig. S6** Gas chromatogram spectrum of the products. Analysis conditions were as follows:  
chromatographic column type, 2 m × Φ 4 mm; packed column, GDX-301; column temperature,  
120 °C; detector type, flame ionization detector (FID); detector and vaporizer temperature, 150 °C;  
and injection volume, 60 μL.

**Table S1** Wight loss of fresh and used Au/SAC catalysts under different temperature ranges

| Temperature/°C                  | <150 | 150-275 | 275-448 | 150-448 |
|---------------------------------|------|---------|---------|---------|
| Wight loss of fresh sample, (%) | 1.2  | 1.6     | 4.6     | 6.2     |
| Wight loss of used sample, (%)  | 0.6  | 1.8     | 11.5    | 13.3    |

**Table S2** Wight loss of fresh and used Au1Co(III)3/SAC catalysts under different temperature ranges

| Temperature/°C                  | <150 | 150-229 | 229-422 | 150-422 |
|---------------------------------|------|---------|---------|---------|
| Wight loss of fresh sample, (%) | 7.3  | 1.1     | 6.8     | 7.9     |
| Wight loss of used sample, (%)  | 3.6  | 1.9     | 7.0     | 8.9     |

**Table S3** The Au species amount of the total Au loading determined by TPR

| Catalyst          | Au species (%)   |                 | Reduction Temperature center/°C |                 |
|-------------------|------------------|-----------------|---------------------------------|-----------------|
|                   | Au <sup>3+</sup> | Au <sup>+</sup> | Au <sup>3+</sup>                | Au <sup>+</sup> |
| Au/SAC            | 18.4             | 15.8            | 310                             | 354             |
| Au1La(III)1/SAC   | 18.7             | 15.2            | 298                             | 334             |
| Au1Co(II)1/SAC    | 18.2             | 16.7            | 305                             | 363             |
| Au1Co(III)0.5/SAC | 26.4             | 17.8            | 291                             | 342             |
| Au1Co(III)1/SAC   | 19.6             | 23.8            | 287                             | 360             |
| Au1Co(III)3/SAC   | 20.3             | 27.9            | 282                             | 372             |
| Au1Co(III)5/SAC   | 9.6              | 32.5            | 247                             | 390             |



**Table S4** Size of Au particles in Au-based catalysts, determined by XRD<sup>a</sup>

| Catalyst          | Au particles Size/nm |        |
|-------------------|----------------------|--------|
|                   | Fresh                | Used   |
| Au/SAC            | <4 <sup>b</sup>      | 20 ± 3 |
| Au1La(III)1/SAC   | <4 <sup>b</sup>      | 23 ± 3 |
| Au1Co(II)1/SAC    | <4 <sup>b</sup>      | 22 ± 3 |
| Au1Co(III)0.5/SAC | <4 <sup>b</sup>      | 18 ± 3 |
| Au1Co(III)1/SAC   | <4 <sup>b</sup>      | 20 ± 3 |
| Au1Co(III)3/SAC   | <4 <sup>b</sup>      | 14 ± 3 |
| Au1Co(III)5/SAC   | <4 <sup>b</sup>      | 21 ± 3 |

<sup>a</sup> Error estimated from XRD peak broadening of 0.06° at the Au (111) reflection at 38.36° (2θ).

<sup>b</sup> It was not possible to assign any error band below 4 nm, as this size is below the XRD method.

**Table S5** Relative content of Au species in the catalysts before and after reaction, determined by XPS

| Catalyst              | Au species (%)   |                 |                 |                   | Binding energies/eV |                 |                 |                   |
|-----------------------|------------------|-----------------|-----------------|-------------------|---------------------|-----------------|-----------------|-------------------|
|                       | Au <sup>3+</sup> | Au <sup>+</sup> | Au <sup>0</sup> | Au <sup>0-s</sup> | Au <sup>3+</sup>    | Au <sup>+</sup> | Au <sup>0</sup> | Au <sup>0-s</sup> |
| Fresh Au/SAC          | 12.6             | 0               | 87.4            | 0                 | 86.4                | -               | 84.1            | -                 |
| Used Au/SAC           | 0                | 0               | 95.6            | 4.4               | -                   | -               | 84.0            | 85.5              |
| Fresh Au1Co(III)3/SAC | 16.6             | 18.4            | 65.0            | 0                 | 86.4                | 85.0            | 84.0            | -                 |
| Used Au1Co(III)3/SAC  | 12.5             | 27.3            | 60.2            | 0                 | 86.9                | 84.8            | 83.7            | -                 |

**Table S6** The loss ratio of Au in those catalysts

| Catalyst          | Au loading, wt% |        | Loss ratio of Au (%) |
|-------------------|-----------------|--------|----------------------|
|                   | Fresh           | used   |                      |
| Au/SAC            | 0.9120          | 0.9030 | 0.99                 |
| Au1La(III)1/SAC   | 0.9152          | 0.9062 | 0.98                 |
| Au1Co(II)1/SAC    | 0.9088          | 0.9003 | 0.94                 |
| Au1Co(III)0.5/SAC | 0.9093          | 0.9004 | 0.98                 |
| Au1Co(III)1/SAC   | 0.9091          | 0.9006 | 0.93                 |
| Au1Co(III)3/SAC   | 0.9119          | 0.9038 | 0.89                 |
| Au1Co(III)5/SAC   | 0.9054          | 0.8971 | 0.92                 |
